# Supplementary material
Source: Research Square preprint supplement (doi:10.21203/rs.3.rs-9370200/v1)
Supplement: Supplementary file 1 [file 5903960845f35fa1980f405e.xlsx]

## Sheet: Sheet1
Figure 1a
Cell	1	1	1
EV	0.92	1.11	0.81
Figure 1c	4h			24h
WT	1.05238	1.01429	1.01714	3.33143	3.77333	4.16952
CD63KO	0.995238	1.0419	0.947619	3.38857	3.8	4.32476
CD9KO	1.02857	1.02476	0.958095	3.64857	3.75429	4.19524
Figure 1e
WT	5	8	15	8	3	5	7	3	9	6	9	7	5	3	4	9	7	3	7	9	3	3	5	8	8	5	3	13	3	6	4	7	3	7	4	7	3	6	6	5	12	7	7	5	4	7	7	3	7
CD63KO	9	4	5	7	8	4	9	7	7	3	2	6	8	15	8	5	3	9	4	3	9	5	9	12	4	3	8	7	7	2	2	3	7	5	15	8	6	8	3	8	7	18	8	8	8	2	8	13	8
CD9K0	4	6	4	9	8	9	9	4	12	7	7	6	7	4	20	2	9	7	9	7	8	2	7	6	6	8	2	9	4	9	8	9	2	8	3	6	2	8	4	5	4	3	9	3	6	9	5	9	2
Figure 1f
WT	1	1	1
CD63KO	0.926473	1.06585	0.840169
CD9KO	0.932685	0.893756	1.13581
Bafilomycin 1	0.197733	0.356248	0.230151
Figure 2b
WT	1	1	1
CD63KO	0.989386	1.22983	0.748944
CD9KO	0.930223	1.04947	0.810979
Figure 2d
WT	3.48286	3.39714	3.58286	3.10571	3.04286	3.19429
CD63KO	3.79714	3.30286	3.38857	3.71714	2.89143	3.49714
CD9KO	3.57429	3.11143	3.19143	3.67714	3.76857	2.86
Figure 2e
WT	1	1	1
CD63KO	0.938001	1.01525	0.92822
CD9KO	0.882408	1.10946	0.82306
Figure 3b	Untreated	siNS	siCD63	siCD9
	0.565085	0.968439	0.070504	0.504897
	0.627522	1.00618	0.074838	0.531469
	0.630123	1.02538	0.075274	0.528724
Figure 3c	Untreated	siNS	siCD63	siCD9
	0.610135	1.00172	0.433917	0.063864
	0.589719	0.993862	0.448101	0.075497
	0.568625	1.00441	0.436132	0.064528
Figure 3d	Untreated	siNS	siCD63	siCD9
	90.1409	100	135.211	104.93
	138.444	100	115.556	293.333
	77.6119	100	114.925	141.791
	60.4651	100	41.5116	82.5581
Figure 4a	Untreated	siNS	siCD63	siCD9
	894.5	842.5	71.5	556.5
	664.5	469.5	79.5	614.5
	656.5	648.5	60.5	521.5
Figure 4b	Untreated	siNS	siCD63	siCD9
	146	220	131	5
	146	161	111	15
	140	163	107	34
Figure 4c	Untreated	siNS	siCD63	siCD9
	5.92	6.32	6.24	6.28
	5.8	5.92	6	5.6
	6.32	6.08	5.52	6.2
Figure 4d	Untreated	siNS	siCD63	siCD9
	136.276	100	108.966	179.281
	96.2121	100	101.515	112.121
	139.636	100	196.364	189.091
	102.97	100	152.277	146.733
[truncated: 39 more columns]
